# Supplementary material for: Anti-fibrotic efficacy of nintedanib in pulmonary fibrosis via the inhibition of fibrocyte activity
Source: Springer Nature journal article supplement (doi:10.1186/s12931-017-0654-2), 2017-09-15
Supplement: MOESM1 [file 15063374]

1 **Anti-fibrotic efficacy of nintedanib in pulmonary fibrosis via the**  
2 **inhibition fibrocyte activity**

3

4 Seidai Sato<sup>1</sup>, Shintaro Shinohara<sup>1</sup>, Shinya Hayashi<sup>1</sup>, Shun Morizumi<sup>1</sup>, Shuichi Abe<sup>1</sup>,  
5 Hiroyasu Okazaki<sup>1</sup>, Yanjuan Chen<sup>1</sup>, Hisatsugu Goto<sup>1</sup>, Yoshinori Aono<sup>1, 2</sup>, Hirohisa  
6 Ogawa<sup>3</sup>, Kazuya Koyama<sup>1</sup>, Haruka Nishimura<sup>1</sup>, Hiroshi Kawano<sup>1</sup>, Yuko Toyoda<sup>1</sup>,  
7 Hisanori Uehara<sup>3</sup>, Yasuhiko Nishioka<sup>1</sup>

8

9 **SUPPLEMENT DATA**

10

11 **Materials and Methods**

12 **Isolation of human fibrocytes and monocytes**

13 Human fibrocytes were isolated according to a previously described method (E1, E2).  
14 All procedures for consent, sample collection, and privacy protection were approved by  
15 the Ethics Committee of Tokushima University Hospital. Human mononuclear cells  
16 (HMNC) were isolated from the peripheral blood of healthy volunteers using Ficoll  
17 density centrifugation (E3). Isolated cells were cultured in DMEM supplemented with  
18 20% fetal bovine serum (FBS), penicillin (100 U/ml), and streptomycin (50 µg/ml) on  
19 bovine fibronectin (R&D systems, Minneapolis, MN)-coated 150-mm cell culture  
20 dishes (BD Pharmingen, Franklin Lakes, NJ). After six to seven days, medium was

1 aspirated and washed with sterile phosphate-buffered saline (PBS) at least six times to  
2 remove floating cells. Adherent cells were defined as circulating fibrocyte-like cells  
3 using a flow cytometric analysis and immunostaining. Monocytes were isolated from  
4 HMNC with CD14 microbead antibodies and an automated magnetic cell separation  
5 device (Automacs™ Pro separator; Miltenyi Biotec K.K. Singapore). Informed consent  
6 was obtained from all volunteers.

7

## 8 **Materials**

9 Nintedanib and SB431542 were obtained from Boehringer Ingelheim GmbH & Co. KG  
10 (Biberach, Germany). SU5416, a VEGFR-specific inhibitor, was purchased from  
11 Abcam (Cambridge, MA). BGJ-398 and imatinib were purchased from Chemietek  
12 (Indianapolis, IN, USA). Bleomycin (BLM) was purchased from Nippon Kayaku Co.  
13 (Tokyo, Japan). Recombinant FGF2 was purchased from PeproTech (Rocky Hill, NJ).  
14 Recombinant PDGF-BB was purchased from Abcam (Cambridge, UK). Recombinant  
15 VEGF-A was purchased from R&D Systems (Minneapolis, MN). Rabbit  
16 anti-S100A4/FSP-1 antibody was purchased from Thermofisher Scientific (Waltham,  
17 MA). Rat anti-CD45 antibody was purchased from BD Pharmingen (Franklin Lakes,  
18 NJ).

19

## 20 **Cell lines**

1 The human lung fibroblast cell line, MRC-5 was purchased from DS PHARMA  
2 BIOMEDICAL (Osaka, Japan). IPF-fibroblasts (IPF) were from a primary culture of  
3 lung tissues from patients with IPF. Cells were maintained in DMEM medium  
4 supplemented with 10% FBS, penicillin (100 U/ml), and streptomycin (50 µg/ml). All  
5 cells were cultured at 37°C in a humidified atmosphere of 5% CO<sub>2</sub> in air.

6

### 7 **Cell culture supernatants**

8 Fibrocytes, monocytes, MRC-5 cells, and IPF-fibroblasts (1x10<sup>6</sup> cells/3 ml) were  
9 cultured in 6-well plates with 0.1% FBS DMEM for 24 hours, and cell culture  
10 supernatants were collected.

11

### 12 **Measurement of growth factors**

13 Mediator concentrations were measured in the cell culture supernatants of fibrocytes,  
14 monocytes, and fibroblasts (MRC-5 cells and IPF-fibroblasts) with commercial  
15 enzyme-linked immunosorbent assay (ELISA) kits. ELISA kits and their sensitivities  
16 were as follows: FGF2, PDGF-AA, PDGF-BB, PDGF-AB, and TGF beta 1 (Abcam,  
17 Cambridge, UK), with sensitivities of 50, 2.5, 1, 10 and 80 pg/ml, respectively;  
18 VEGF-A (eBioscience, San Diego, CA) with a sensitivity of 7.9 pg/ml; VEGF-B  
19 (Abnova, Jhouzih St, Taipei, Taiwan) with a sensitivity of 8 pg/ml; VEGF-C (R&D  
20 Systems, Minneapolis, MN), with a sensitivity of 4 pg/ml.

1

## 2 **Immunoblot analysis**

3 Whole cell extracts were prepared with M-PER reagents (Thermo Fisher Scientific,  
4 Waltham, MA USA) containing phosphatase and protease inhibitor cocktails (Roche,  
5 Basel, Switzerland).

6 In order to compare the expression of the receptors and growth factors in each cell, cell  
7 extracts of fibrocytes and monocytes from three different donors were collected shortly  
8 after their isolation. Cell extracts from MRC-5 and IPF-fibroblasts were collected after  
9 culturing in DMEM containing 10% FBS.

10 In order to examine the effects of growth factors produced by fibrocytes and  
11 nintedanib on the phosphorylation of growth factor receptors, MRC-5 cells were  
12 cultured in culture medium containing FBS 0.1%, and were then incubated with  
13 nintedanib at different concentrations (0-10  $\mu$ M) or the cell culture supernatant of  
14 fibrocytes for 10 minutes. Cell extracts were then collected.

15 Protein concentrations were measured using the Bradford method. The same amounts  
16 of total cell extract proteins were electrophoresed on 4-10% NuPAGE Bis-Tris Mini  
17 Gels. Gel proteins were then electrophoretically transferred onto polyvinylidene  
18 difluoride membranes (Millipore, Billerica, MA) using the WSE-4040 HorizeBLOT  
19 4M-R system (ATTO, Tokyo, Japan). The membrane was treated with the blocking  
20 agent Blocking One (Nacalai Tesque) for one hour and incubated at 4°C overnight with

1 the first antibodies. Following 4 washes, the membrane was incubated with horseradish  
2 peroxidase-conjugated secondary antibodies (GE Healthcare, Fairfield, CT) in buffer at  
3 room temperature for one hour. The membrane was washed and developed using  
4 Amersham ECL Western Blotting Detection Reagents (GE Healthcare, Fairfield, CT),  
5 and signals were detected using an enhanced chemiluminescence system (GE  
6 Healthcare, Fairfield, CT).

7 The first antibodies used were as follows: anti-FGF2 antibody (1:1000 dilution,  
8 ab106245, Abcam, Cambridge, UK), anti-FGF Receptor 2 antibody (1:1000 dilution,  
9 #11835, Cell Signaling Technology, Danvers, MA), anti-phospho FGF Receptor  
10 antibody (1:1000 dilution, #3471, Cell Signaling Technology, Danvers, MA),  
11 anti-PDGF-BB antibody (1:000 dilution, ab23914, Abcam, Cambridge, UK),  
12 anti-PDGF Receptor  $\alpha$  antibody (1:1000 dilution, #3164, Cell Signaling Technology,  
13 Danvers, MA), anti- PDGF Receptor  $\beta$  antibody (1:1000 dilution, #3169, Cell Signaling  
14 Technology, Danvers, MA), anti-Phospho-PDGF Receptor  $\alpha/\beta$  antibody (1:1000  
15 dilution, #3170, Cell Signaling Technology, Danvers, MA), anti-Vinculin antibody  
16 (1:1000 dilution, #4650, Cell Signaling Technology, Danvers, MA), and anti- $\beta$ -actin  
17 antibody (1:200 dilution, Santa Cruz, Dallas, TX). Densitometric quantification was  
18 done by Image J 1.6.0\_24 software (National Institute of Health).

19

20 **Proliferation assay**

1 MRC-5 cells ( $8 \times 10^3$  cells/well) were seeded on a 96-well plate, and cultured in the cell  
2 culture supernatant of fibrocytes with various concentrations of nintedanib, BGJ398,  
3 imatinib, and SU5416 (0-1  $\mu$ M) or in medium containing recombinant growth factors  
4 (FGF2: 30 ng/ml, PDGF-AA: 100 ng/ml, PDGF-BB: 100 ng/ml, VEGF-A: 100 ng/ml)  
5 for 72 hours. One  $\mu$ Ci/well of [ $^3$ H] thymidine deoxyribose ( $^3$ H-TdR) was pulsed for the  
6 final 18 hours and the incorporation of  $^3$ H-TdR was measured using a liquid scintillation  
7 counter (E1).

8

#### 9 **Differentiation assay with inhibitors**

10 HMNC ( $200 \times 10^4$  cells/ml) were seeded in fibronectin-coated 6-well plates with  
11 DMEM containing 20% FBS and inhibitors. Various concentrations of inhibitors such as  
12 nintedanib, BGJ398, imatinib, SU5416, and SB431542 (0-1  $\mu$ M) were added every 72  
13 hours. Serum amyloid P (0-1  $\mu$ M) was added every 48 hours as reported previously (E4).  
14 On day 6, floating cells were washed out with PBS more than six times, and adherent  
15 cells were trypsinized and counted as human fibrocytes. All experiments were  
16 performed in triplicate.

17

#### 18 **Differentiation assay with recombinant growth factors**

19 HMNC ( $200 \times 10^4$  cells/ml) were seeded in fibronectin-coated 6-well plates with  
20 DMEM containing 4% FBS, growth factors (FGF2: 30 ng/ml, PDGF-BB: 100 ng/ml,

1 VEGF-A: 100 ng/ml), and various concentrations of inhibitors (nintedanib, BGJ398,  
2 imatinib, and SU5416: 0-1  $\mu$ M). Every growth factor and inhibitor was added again  
3 every 48 hours. On day 6, attached cells were stained with Diff-Quick (Baxter, Miami,  
4 FL), and counted in five fields at 100x magnification. All experiments were performed  
5 in triplicate.

6

### 7 **Cytotoxicity of nintedanib against fibrocytes**

8 HMNC ( $200 \times 10^4$  cells/ml) were cultured on fibronectin-coated 6-well plates with  
9 DMEM containing 20% FBS from days 0 to 6. On day 6, after floating cells were  
10 washed out with PBS more than six times, various concentrations of nintedanib (0-1  
11  $\mu$ M) were added with new DMEM. Nintedanib was added on day 9 again, and the  
12 number of adherent cells was counted on day 13 after trypsinization. All experiments  
13 were performed in triplicate.

14

### 15 **Cell migration assay**

16 The migration assay was performed using cell culture inserts with a pore size of 8  $\mu$ m  
17 (BD Bioscience, San Jose, CA, USA) (E1, E2). Fibrocytes in DMEM containing 0.1%  
18 of FBS were added to the upper chamber in the presence or absence of various  
19 concentrations of nintedanib, BGJ398, or imatinib (0-100 nM). A total of 30 ng/ml of  
20 FGF2 or 100 ng/ml of PDGF-BB or 100 ng/ml of VEGF-A was added to the lower

1 chamber. After a 20 hour incubation, fibrocytes that had migrated to the bottom surface  
2 of the filter were stained with Diff-Quick (Baxter, Miami, FL), and counted in five  
3 randomly selected fields on each filter under a microscope at 200x magnification. All  
4 experiments were performed in triplicate.

5

### 6 **BLM-induced lung fibrosis in mice**

7 Eight-week-old C57BL/6 male mice were purchased from CLEA Japan (Tokyo, Japan).  
8 Mice were maintained in the animal facility of Tokushima University under specific  
9 pathogen-free conditions according to the guidelines of our university (E3). The present  
10 study was approved by the Institutional Animal Care and Use Committee of Tokushima  
11 University (Permission Number: 14099).

12 Eight-week-old C57BL/6 mice received a single transbronchial installation of 7.5  
13 mg/kg NaCl or BLM on day 0. Nintedanib or distilled water was administered daily by  
14 gavage at 30 and 60 mg/kg from days 0 to 7 or 21. The lung tissues analyzed on day 7  
15 were used in a FACS analysis and immunohistochemistry. The lung tissues analyzed on  
16 day 21 were used for a histopathological analysis and in a hydroxyproline colorimetric  
17 assay.

18

### 19 **Histopathology**

20 Right lung tissues were harvested, fixed in 10% formalin, and embedded in paraffin.



1 Three-micrometer-thick sections were stained with hematoxylin and eosin (H&E) or  
2 azan mallory. In the quantitative analysis, a numeric fibrotic scale was used (Ashcroft  
3 score) (E5). The mean score was considered to be the fibrotic score.

4

#### 5 **Immunohistochemistry**

6 Paraffin-embedded lung sections were stained with primary antibodies (rabbit  
7 anti-S100A4/FSP-1 antibody and rat-anti-CD45 antibody) at 4°C overnight and  
8 subsequently stained with fluorescence-conjugated secondary antibodies and 4',  
9 6-diamidino-2-phenylindole at room temperature for 1 hour (E1). Fluorescence images  
10 were captured with a confocal laser scanning microscope at 20x magnification (Nikon  
11 A1R resonant scanning confocal system, Tokyo, Japan). Double-positive cells for  
12 S100A4/FSP-1 and CD45 were counted in five randomly selected fields by using three  
13 independent lung sections.

14

#### 15 **FACS**

16 Minced lungs were digested, and harvested cells were stained with  
17 phycoerythrin-cyanine 5-labeled anti-mouse CD45 antibody, phycoerhthrin-labeled  
18 anti-mouse CXCR4 antibody, and biotin-conjugated anti-mouse collagen-1 antibody,  
19 followed by streptavidin-FITC. Stained cells were analyzed using a FACScan flow  
20 cytometer (BD Biosciences-Pharmingen, San Diego, CA) (E1).

1

## 2 **Statistical analysis**

3 The significance of differences was analyzed using a Mann–Whitney *U* test for unpaired  
4 samples or a one-way ANOVA followed by a Dunnett's test. Where appropriate, the  
5 Kruskal-Wallis H test was applied with Dunn's test. *P* values of less than 0.05 were  
6 considered to be significant. Statistical analyses were performed using GraphPad Prism  
7 programme Ver. 5.01 (*GraphPad Software Inc.*).

8

## 9 **References**

- 10 E1. Aono Y, Kishi M, Yokota Y, Azuma M, Kinoshita K, Takezaki A, Sato S, Kawano H,  
11 Kishi J, Goto H, Uehara H, Izumi K, Nishioka Y. Role of platelet-derived growth  
12 factor/platelet-derived growth factor receptor axis in the trafficking of circulating  
13 fibrocytes in pulmonary fibrosis. *Am J Respir Cell Mol Biol.* 2014; 51:793-801.
- 14 E2. Makino H, Aono Y, Azuma M, Kishi M, Yokota Y, Kinoshita K, Takezaki A, Kishi J,  
15 Kawano H, Ogawa H, Uehara H, Izumi K, Sone S, Nishioka Y. Antifibrotic effects of  
16 CXCR4 antagonist in bleomycin-induced pulmonary fibrosis in mice. *J Med Invest.*  
17 2013;60:127-37.
- 18 E3. Nishioka Y, Nishimura N, Suzuki Y, Sone S. Human monocyte-derived and  
19 CD83(+) blood dendritic cells enhance NK cell-mediated cytotoxicity. *Eur J Immunol.*  
20 2001; 31:2633-2641.

1 E4. Pilling D, Buckley CD, Salmon M, Gomer RH. Inhibition of fibrocyte  
2 differentiation by serum amyloid P. J Immunol. 2003 15;171:5537-5546.  
3 E5. Ashcroft T, Simpson JM, Timbrell V. Simple method of estimating severity of  
4 pulmonary fibrosis on a numerical scale. J Clin Pathol. 1988; 41:467-70.

5

## 6 **Figure legends**

### 7 **Figure S1.**

8 Nintedanib inhibits the differentiation of fibrocytes. HMNC were cultured for six days  
9 on fibronectin-coated dishes with kinase inhibitors in DMEM containing 20% FBS.  
10 Inhibitors such as (A) nintedanib, (B) BGJ398, (C) imatinib, (D) SU5416, and (F)  
11 SB431542 were added every 72 hours. (E) Serum amyloid P was added every 48 hours.  
12 On day 6, the number of adherent cells was counted as human fibrocytes. (G)  
13 Representative photographs of fibrocytes generated from HMNC treated with  
14 nintedanib on day 6 (Scale bar = 100µm). Data were analyzed using the Kruskal-Wallis  
15 H test and displayed as median and interquartile range of six separate experiments. In  
16 all graphs: \* $P < 0.05$  versus the group treated without each inhibitor.

17

### 18 **Figure S2**

19 Nintedanib did not cause cellular damage in fibrocytes. After HMNC were cultured on  
20 fibronectin-coated dishes for six days, nintedanib was added on days 6 and 9. On day 12,

1 the number of adherent cells was counted. (A) Data were displayed as median and  
2 interquartile range of four separate experiments. (B) Representative photographs of  
3 fibrocytes treated with nintedanib on day 12 (Scale bar = 100 $\mu$ m).

4

5 **Figure S3.**

6 Histological examination of the anti-fibrotic effects of nintedanib on bleomycin  
7 (BLM)-induced lung fibrosis. C57BL/6 mice received an intranasal instillation of 7.5  
8 mg/kg NaCl or BLM. Nintedanib was administered each day by gavage at 30 and 60  
9 mg/kg from days 0 to 21. Analyses were performed on day 21. A histological  
10 examination was performed by staining with hematoxylin and eosin (H&E) (A, C, E, G,  
11 and I) and azan mallory (B, D, F, H, and J) (scale bar = 1mm). (A, B) Distilled water. (C,  
12 D) nintedanib (60 mg/kg) alone. (E, F) BLM alone. (G, H) BLM + nintedanib (30  
13 mg/kg). (I, J) BLM + nintedanib (60 mg/kg).

14

15 **Figure S4.**

16 Quantitative examination of the anti-fibrotic effects of nintedanib on bleomycin  
17 (BLM)-induced pulmonary fibrosis. (A) Evaluation of fibrotic changes in the lung using  
18 a numeric fibrotic score. A histological examination of the right lung was performed  
19 using H&E staining. Data were analyzed using a one-way ANOVA and displayed as  
20 mean  $\pm$  SD of all fields examined in each group. (B) Collagen contents in left lung lobes

1 were measured using a hydroxyproline colorimetric assay. Data were analyzed using a  
2 one-way ANOVA and displayed as means  $\pm$  SD in each group. The number of mice  
3 used for analysis in each group is shown in the figure as “n”. Data are representative of  
4 two separate experiments. \* $P$ <0.05, \*\* $P$ <0.01 versus the group treated with BLM  
5 alone.

6

7 **Figure S5.**

8 Anti-fibrotic role of nintedanib in pulmonary fibrosis via the suppression of fibrocyte  
9 activity. Fibrocytes and fibroblasts produce fibrotic growth factors such as FGF and  
10 PDGF. Growth factor receptors on resident fibroblasts may be activated by fibrocytes or  
11 by fibroblasts themselves, and induce the proliferation of fibroblasts. We herein show  
12 that nintedanib has three anti-fibrotic roles in pulmonary fibrosis. Nintedanib inhibits  
13 the proliferation of fibroblasts induced by fibrocytes, the differentiation of fibrocytes  
14 from monocytes, and the migration of fibrocytes. Consequently, nintedanib inhibits the  
15 pro-fibrotic activity of fibrocytes.
