# Supplementary material for: Anti-fibrotic efficacy of nintedanib in pulmonary fibrosis via the inhibition of fibrocyte activity
Source: Springer Nature journal article supplement (doi:10.1186/s12931-017-0654-2), 2017-09-15
Supplement: MOESM2 [file 15063374]

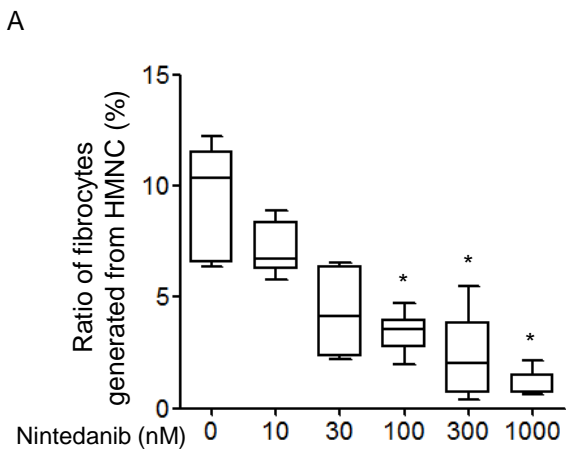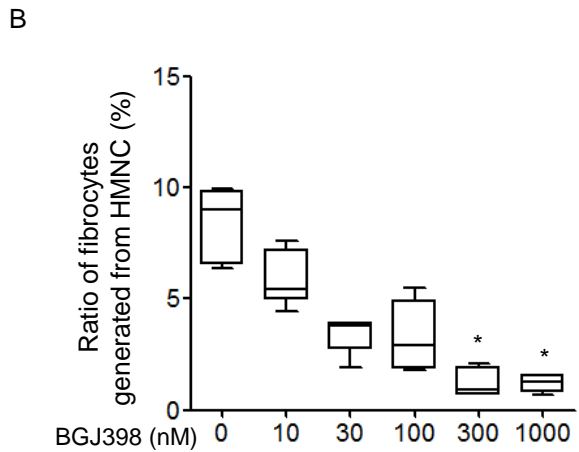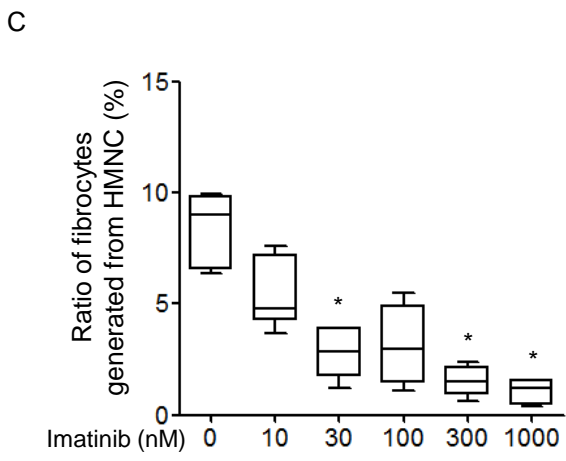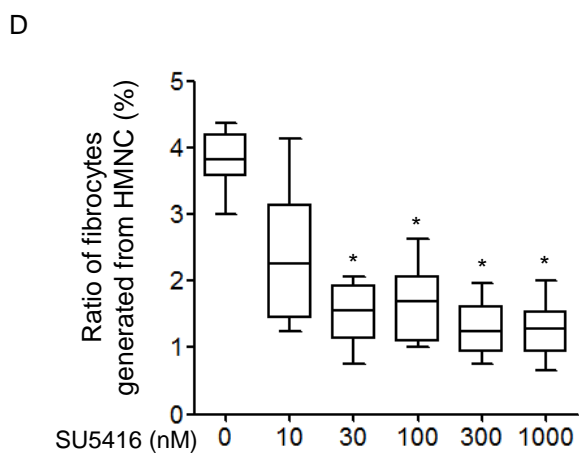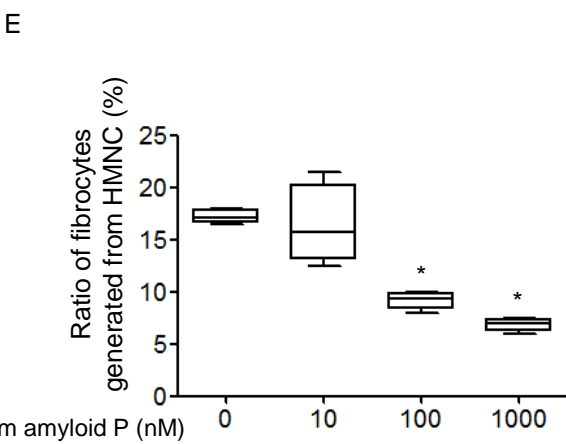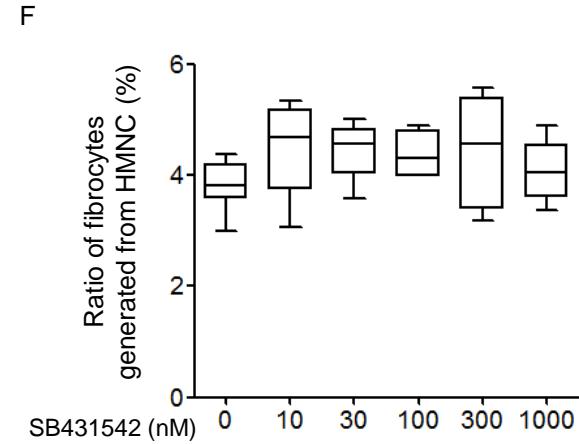

Figure S1

G

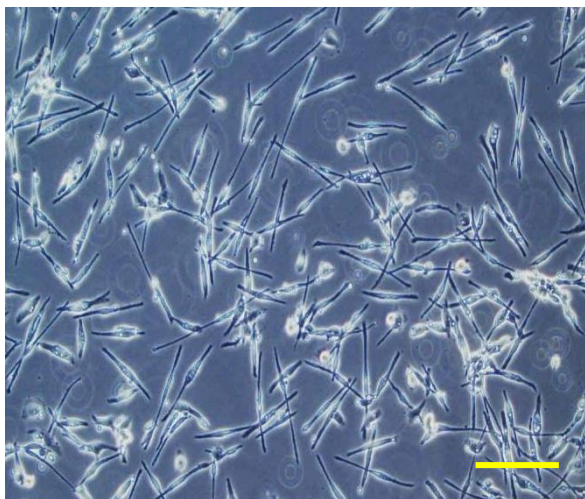

+Vehicle

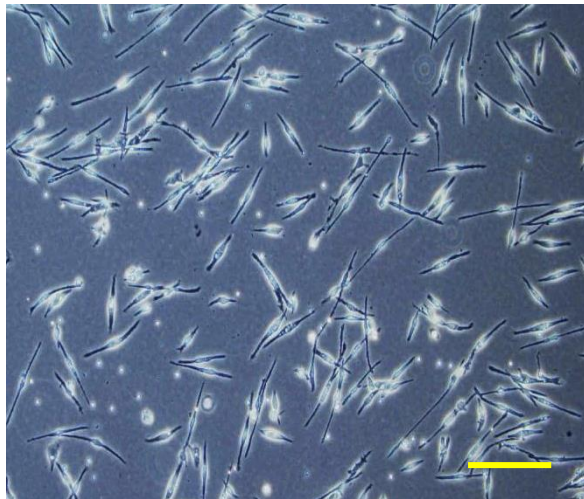

+Nintedanib 10nM

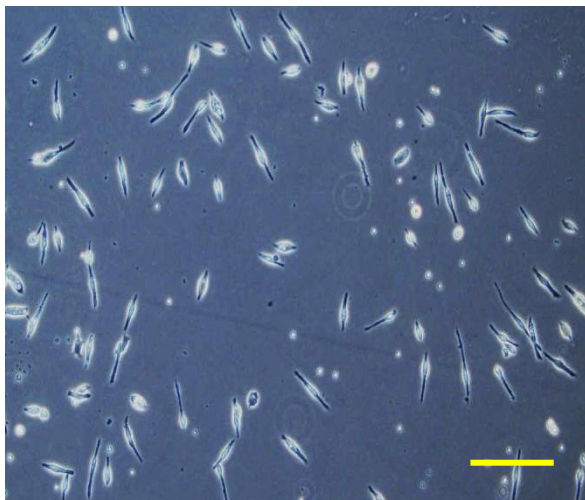

+Nintedanib 100nM

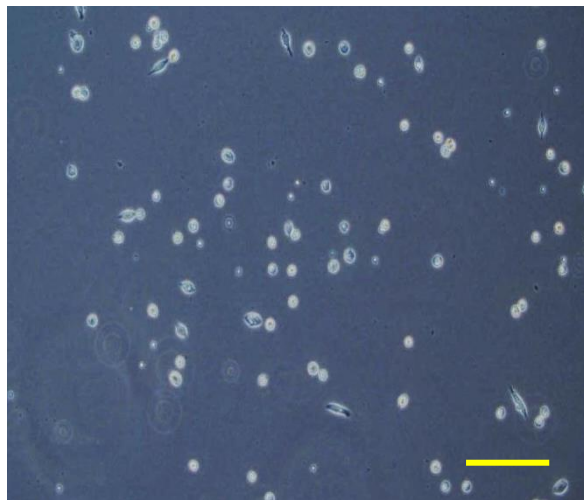

+Nintedanib 1µM

A

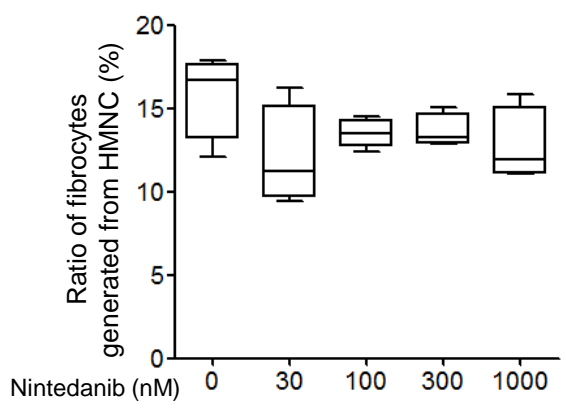

B

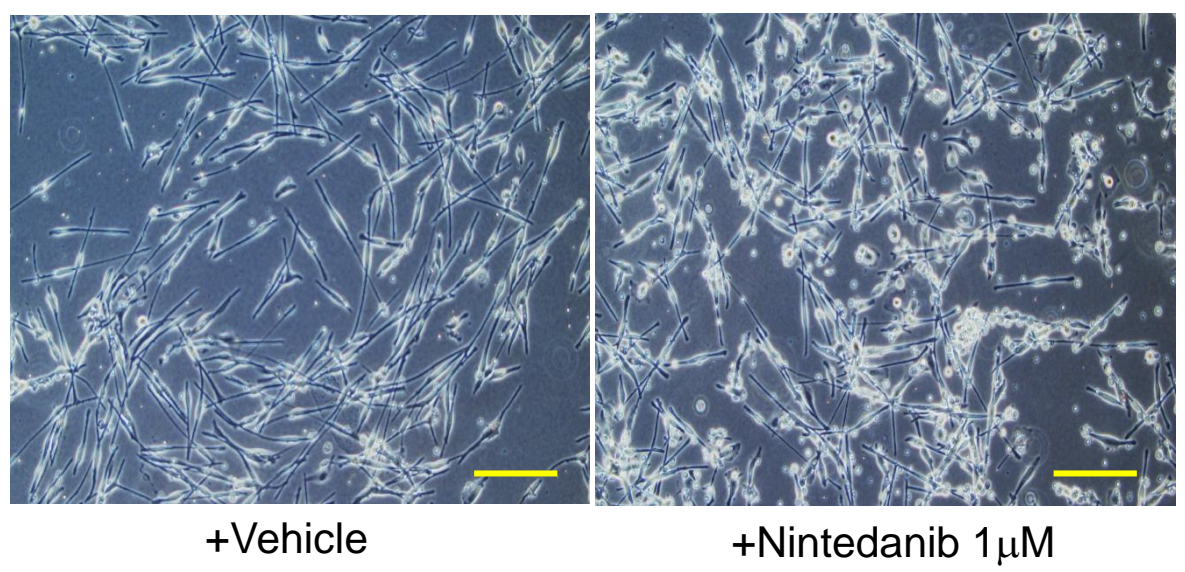

Figure S2

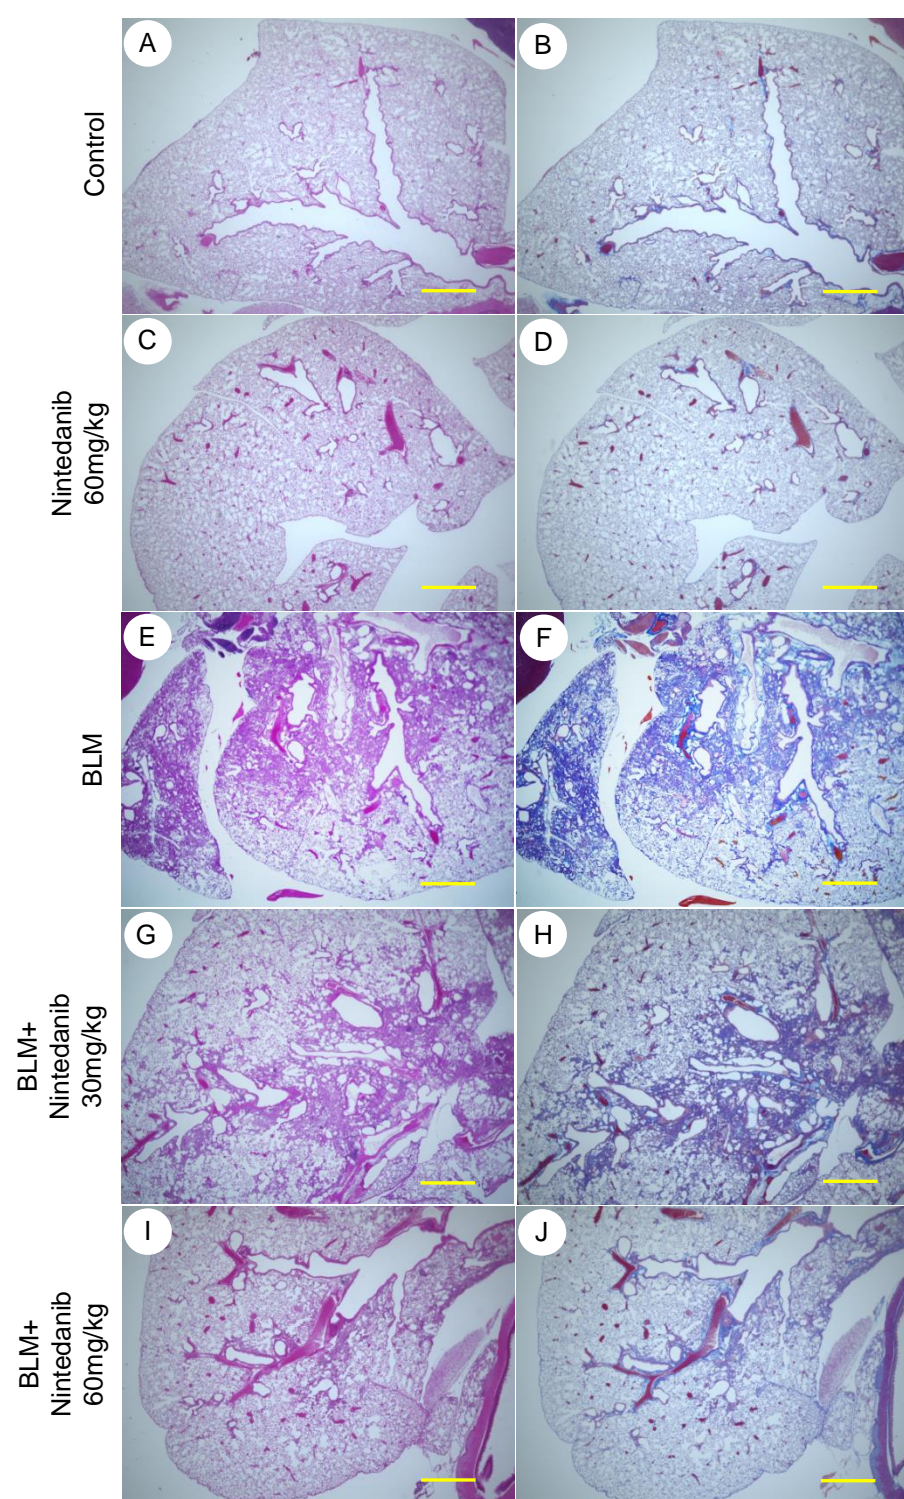

Figure S3

A

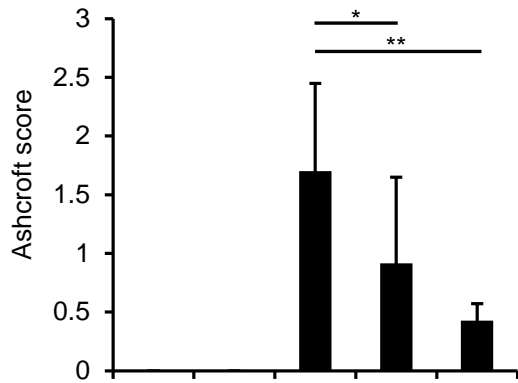

B

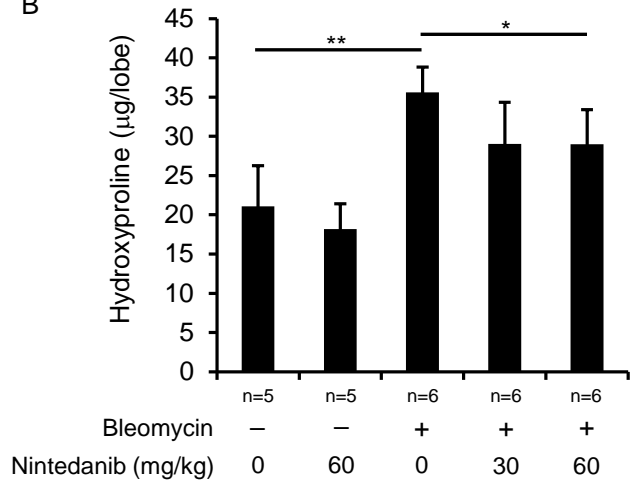

Figure S4

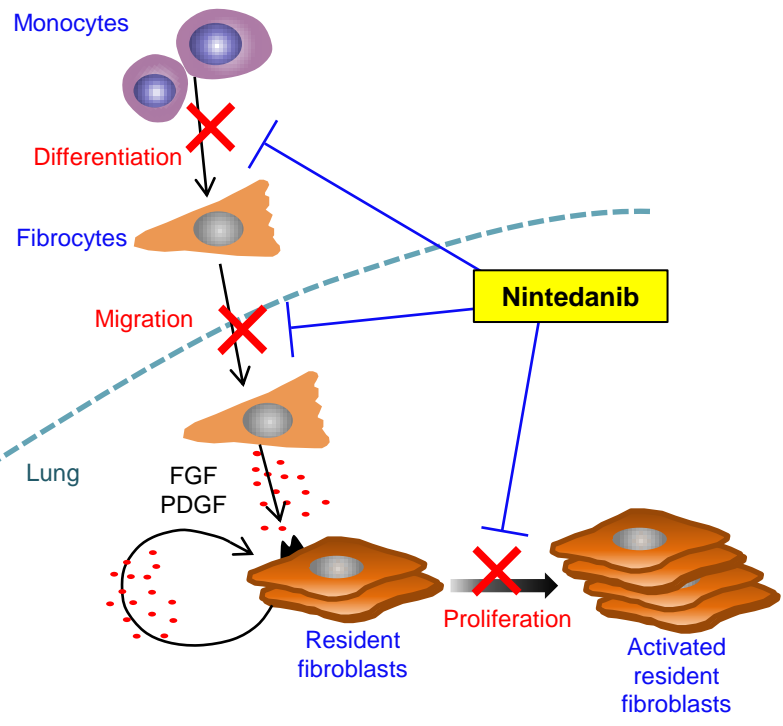

Figure S5
